# Supplementary material
Source: publisher figshare collection journal article supplement (https://acs.figshare.com/ndownloader/files/11524382)
Supplement: Supplementary file 1 [file 11524382]

Investigation on upconversion luminescence and optical temperature  
sensing behaviour for  $\text{Ba}_2\text{Gd}_2\text{Si}_4\text{O}_{13}:\text{Yb}^{3+}\text{-Er}^{3+}/\text{Ho}^{3+}/\text{Tm}^{3+}$  phosphors

Jia Zhang<sup>1,2,\*</sup>, Xiumin Jiang<sup>1</sup>, Zhenghe Hua<sup>1,2</sup>

<sup>1</sup>Physics department and Jiangsu Key Laboratory of Modern Measurement  
Technology and Intelligence, Huaiyin Normal University, 111 West Chang Jiang Road,  
Huai'an 223300, China

<sup>2</sup>Jiangsu Key Laboratory for Chemistry of Low-Dimensional Materials, Huaiyin  
Normal University, 111 West Chang Jiang Road, Huai'an 223300, China

\*Corresponding author.

E-mail address: zhangjianew@126.com

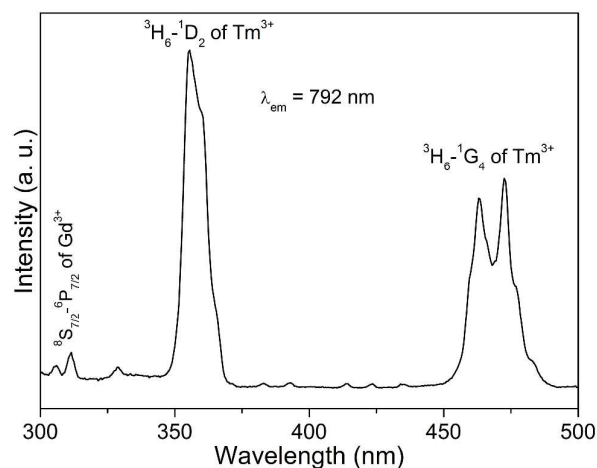

Figure S1 Excitation spectrum of BGS:0.2Yb<sup>3+</sup>, 0.04Tm<sup>3+</sup> monitored at 792 nm

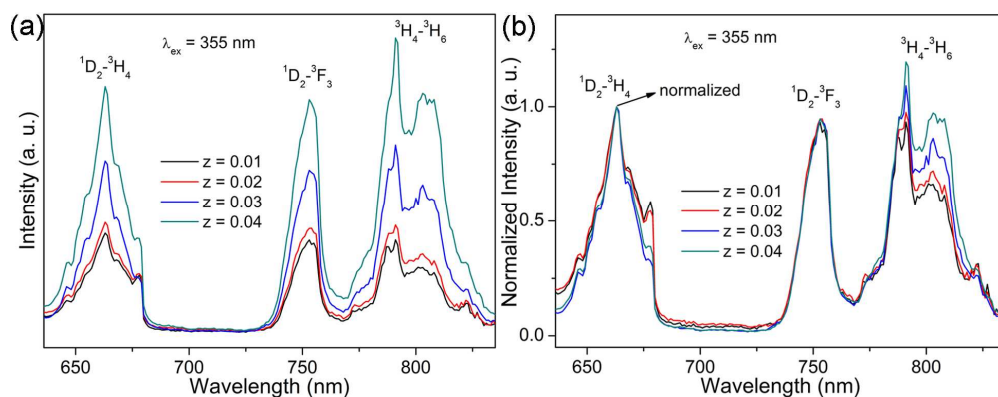

Figure S2 (a) Emission spectra of BGS:0.2Yb<sup>3+</sup>, zTm<sup>3+</sup> (0.01 ≤ z ≤ 0.04) by exciting at 355 nm; (b) normalized (for 664 nm) emission spectra of BGS:0.2Yb<sup>3+</sup>, zTm<sup>3+</sup> (0.01 ≤ z ≤ 0.04)

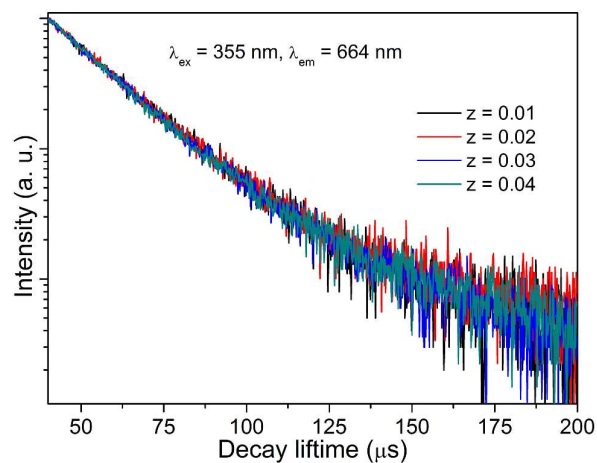

Figure S3 Decay curves of BGS:0.2Yb<sup>3+</sup>, zTm<sup>3+</sup> (0.01 ≤ z ≤ 0.04)

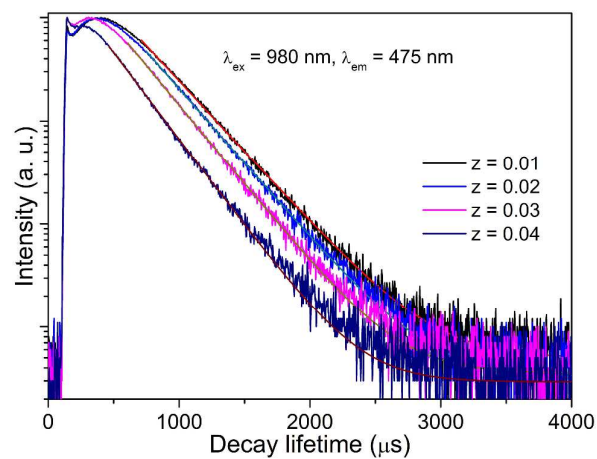

Figure S4 Decay curves of BGS:0.2Yb<sup>3+</sup>,zTm<sup>3+</sup> ( $0.01 \leq z \leq 0.04$ )

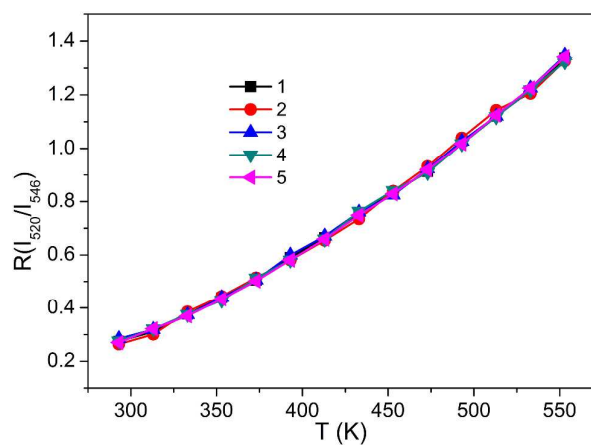

Figure S5 Dependence of  $R(I_{520}/I_{546})$  for BGS:0.2Yb<sup>3+</sup>,0.02Er<sup>3+</sup> on the absolute temperature by repeating measurement for five times
